# Supplementary material for: Ultra-efficient and stable heterogeneous iron-based Fenton nanocatalysts for degrading organic dyes at neutral pH via a chelating effect under nanoconfinement
Source: Royal Society of Chemistry journal article supplement (doi:10.1039/d0cc01662d), 2020-01-01
Supplement: d0cc01662d1.pdf [file d0cc01662d1.pdf]

## Electronic supplementary Information (ESI)

*For*

# Ultra-efficient and Stable Heterogeneous Fenton Nanocatalysts for Degrading Organic Dyes via Chelating Effect at Neutral Conditions under Nanoconfinement

Jiayou Lin<sup>a, #</sup>, Sheng Chen<sup>a, #</sup>, Hongyan Xiao<sup>a</sup>, Jiawen Zhang<sup>b</sup>, Jianwu Lan<sup>a</sup>, Bin  
Yan<sup>a,b\*</sup>, Hongbo Zeng<sup>b</sup>

a National Engineering Laboratory for Clean Technology of Leather Manufacture, College of  
Biomass Science and Engineering, Sichuan University, Chengdu, 610065, China

b. Department of Chemical and Materials Engineering, University of Alberta, Edmonton, Alberta  
T6G 1H9, Canada

# JYL and SC contributed equally to this work.

\*Email: [yanbinscu@126.com](mailto:yanbinscu@126.com) (B.Y.)

**1. Chemicals.** Dopamine hydrochloride (DA), tetraethylorthosilicate (TEOS) (99%),  $\text{FeCl}_3 \cdot 6\text{H}_2\text{O}$  were purchased from Sigma Aldrich.  $\text{NH}_3 \cdot \text{H}_2\text{O}$  (25%),  $\text{NaHCO}_3$ , Tris(hydroxymethyl)aminomethane, ethanol, methylene blue (MB), Neutral Red (NR), Rhodamine B (RHB), Congo Red (CR), HCl and NaOH were purchased from Chemical Co. Ltd, Chengdu, China. All chemicals were analytical grade and used without further purification. The autoclave was obtained from ShengJinKang Instrument Co. Ltd, Chengdu, China. Deionized water (18.2 M $\Omega$  cm) used for all experiments was produced from Experimental Water System (2YUPT-II-IUT).

**2. Characterizations.** The morphology of samples was studied by a field emission scanning electron microscopy (FE-SEM) (JSM-5900LV, JEOL) operated at 15 kV and transmission electron microscopy (TEM) (Tecnai G2 F20 S-TWIN, FEI) at 200 kV. Fourier-transfer infrared (FTIR) spectra were recorded on a Nicolet 6700 spectrometer. The spectra were recorded over a wavelength range from 400 to 4000  $\text{cm}^{-1}$ . The specific surface areas of MPOPs were measured on a Micromeritics Gemini 3.04 nitrogen-adsorption apparatus (Micromeritics Instrument Corporation, America) using the Brunauer-Emmett-Teller (BET) method at a relative pressure ratio ranging from 0 to 1 at 77 K. Powder X-ray diffraction (XRD) measurements were performed using Xcalibur E diffractometer. Magnetic characterization was measured by a superconducting quantum interfere device (SQUID) magnetometry with applied magnetic field ranging from -3 T to 3 T at 300 K. To figure out the catalysis process, p-phthalic acid (PTA) was introduced to form 2-hydroxyterephthalic acid with hydroxyl radicals, which could be determined by Fluorescence spectrophotometer (F7100). Zeta potential measurements were performed on Nano ZSP (ZEN5600, Malvern instruments Co. Ltd)

**3. Synthesis of Magnetic  $\text{Fe}_3\text{O}_4$  nanoparticles.** The magnetic nanoparticles were synthesized according to a reported procedure.<sup>1</sup> In brief,  $\text{FeCl}_3$  solution (0.3 mM, 10 mL) was added into aqueous  $\text{NaHCO}_3$  solution (0.45 mM, 20

mL). After vigorously stirring for 30 min, an aqueous solution of vitamin C (88 mg, 10 ml) was added dropwise into the above mixture. Then, the resulting mixture was transferred into an autoclave and heated at 150 °C for 4 h. The black products were collected magnetically followed with washing ethanol and water several times. Finally, the magnetic nanoparticles were dispersed into water and stored at 4 °C for further use.

**4. Synthesis of magnetic nanoparticles impregnated porous PDA organic nanocomposites (MPOPs).** Briefly, ethanol (12 mL) and deionized water (40 mL) were mixed with concentrated ammonium solution (0.5 ml, 6 M). After 30 min mixing, Fe<sub>3</sub>O<sub>4</sub> nanoparticles (0.2 g) and TEOS (0.5 mL) were added successively into the above mixture. After 24 h reaction, an aqueous solution of DA (0.05 g/mL, 4 mL) was added and the resulting mixture was stirred for another 24 h. The resulting compact Fe<sub>3</sub>O<sub>4</sub>@PDA/SiO<sub>2</sub> nanocomposites were collected by centrifuging at 8000 rpm for 10 min. To obtain the mesoporous structure, the above product was dispersed in Tris-HCl buffer solution (10 mM, 40 mL) and transferred into an autoclave, which was heated at 140 °C for another 24 h. Finally, MPOPs were collected by centrifugation followed with washing with deionized water and ethanol for several times. The as-prepared MPOPs were first dispersed in deionized water and the pH of the MPOPs solution was adjusted to 7. The whole mixture was sonicated for 20 min to obtain a homogenous solution. Then, 20 mL of the above solution was dried under vacuum at 100 °C for 24 hr to determine the exact concentration of the MPOP solution in mg/mL. For the degradation experiment, a certain volume of the solution was taken so that the desired weight of the input MPOPs can be adopted.

**5. Degradation experiments of MB.** Typically, batch experiments of MB degradation in aqueous solution by using the as-prepared MPOPs were carried out in a shaker at 280 rpm at 25 °C. In these experiments, MB solutions with desired concentrations (from 40 to 300 ppm) were obtained through the dilution

of stock solution (500 ppm). To study the effect of MB concentration on the degradation performance of MPOPs, H<sub>2</sub>O<sub>2</sub> solution (30%, 1 mL) and MPOPs (2 mg) were added into the above mentioned MB solutions (20 mL). After different time intervals, the mixed solutions (2 mL) were collected by using 0.22 µm PES membrane filters and then the remaining MB concentration was determined using a UV-vis spectrophotometer (UV-2700). The degradation efficiency by MPOPs was determined according to the equation below:

$$Removal\ efficiency = \frac{(C_0 - C_t)}{C_0} \times 100\% \quad (1)$$

where  $C_0$  and  $C_t$  (ppm) are the initial concentration and the residual concentration of MB solution at time  $t$  (min).

The effect of the pH on degradation of MB solution was also investigated. First, the pH of MB solution was adjusted to a desired value using 0.1 M HCl/NaOH solutions with the help of a pH meter (Mettler Toledo Co., Ltd., Shanghai, China). Then H<sub>2</sub>O<sub>2</sub> solution (30%, 1 mL) and MPOPs (2 mg) were added into the MB solutions (80 ppm, 20 mL) with certain pH. The degradation efficiency under different pH at different time intervals was obtained by the above experimental protocol.

In order to investigate the degradation mechanism, different reagents (i.e., 2 mg of MPOPs and 1 mL H<sub>2</sub>O<sub>2</sub>, 2 mg of MPOPs, 2 mg of Fe<sub>3</sub>O<sub>4</sub> and 1 mL of H<sub>2</sub>O<sub>2</sub>, 1 mL of H<sub>2</sub>O<sub>2</sub>) were added into MB solutions (80 ppm, 20 mL) at neutral pH of 7. The degradation efficiency at different time intervals was obtained using the same protocol as mentioned above.

These data were fitted by using the pseudo-first order kinetic model:

$$-\ln(C_t/C_0) = K \times t \quad (2)$$

where  $C_0$  and  $C_t$  (ppm) are initial concentration of MB solution and the residual MB concentration for time  $t$  (min),  $K$  is the constant of pseudo-first order kinetic.

**6. Fe-leaching experiments.** Typically, MPOPs (2 mg) was added into a mixture of MB solution (20 mL, 80 ppm) and H<sub>2</sub>O<sub>2</sub> solution (30 wt%, 1 mL). After reaction, the solution was collected through a 0.22  $\mu$ m PES membrane filter for ICP measurement to determine the Fe leaching in solution.

**7. MPOPs cycling experiments.** Typically, MPOPs (2 mg) were added into 20 mL of MB solution (80 ppm, pH 7) containing 1 mL H<sub>2</sub>O<sub>2</sub>. The mixture was stirred at 25 °C for 60 min, and then collected by centrifugation (8000 rpm, 5 min). The collected MPOPs were regenerated by washing with ethanol instead of DI water. Compared to that regenerated with DI water, we found that it is much easier to collect the used MPOPs by centrifugation via ethanol regeneration, although the activity of MPOPs after washing with DI water is almost the same as that with ethanol. The regenerated MPOPs were reused in the successive degradation experiment. The above procedures were repeated for 4 times. The mass loss of the MPOPs was also determine after the last cycling experiment by collecting the MPOPs by centrifugation followed with drying at vacuum at 100 °C overnight. It turned out that only 6% of the MPOPs have been lost after 4 times cycling.

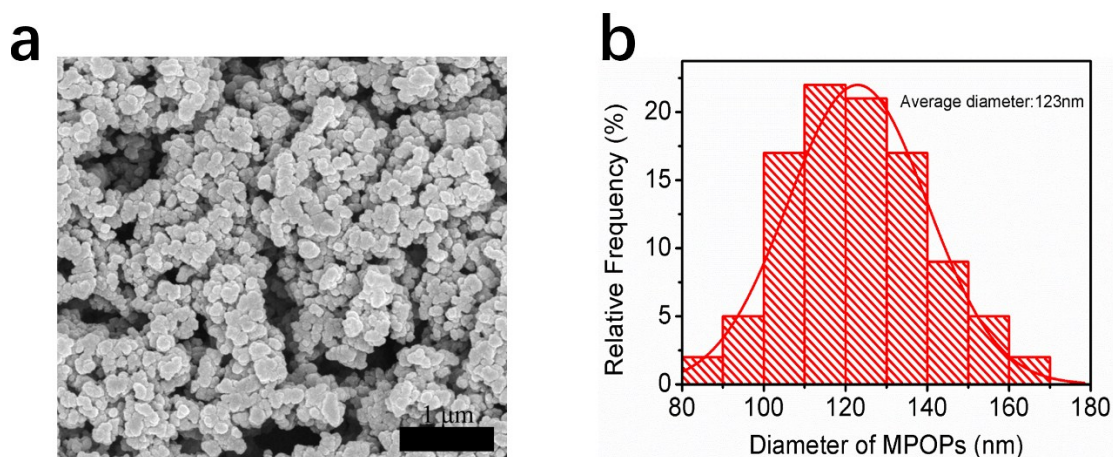

**Fig. S1** a) The SEM image and b) the diameter distribution of MPOPs.

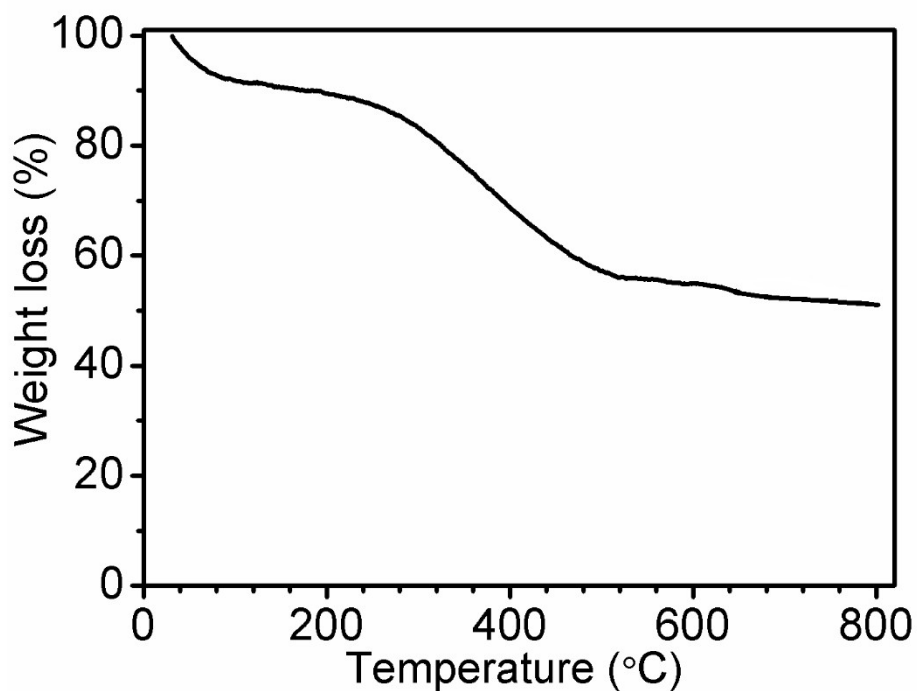

**Fig. S2** Thermogravimetric analysis (TGA) plot curve of MPOPs under with nitrogen atmosphere.

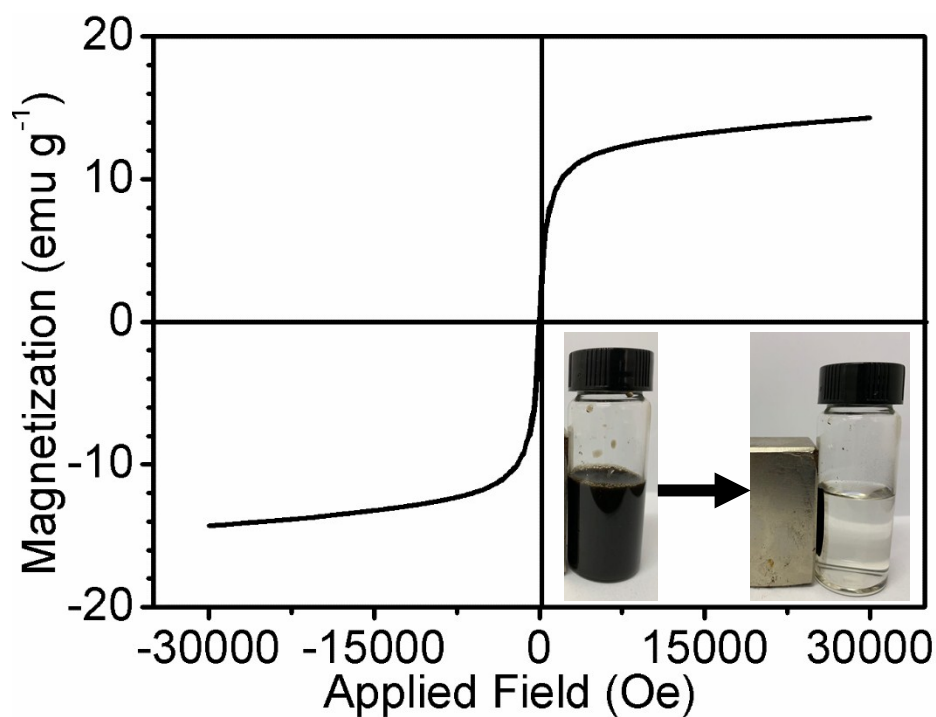

**Fig. S3** The hysteresis loop of MPOPs measured at 300 K (the inset shows the dispersion of MPOPs in water and after an external magnetic field is applied). The saturation magnetization value for MPOPs is about 15 emu g<sup>-1</sup>, which allows fast separation of the dispersed MPOPs from the solution using an external magnetic field.

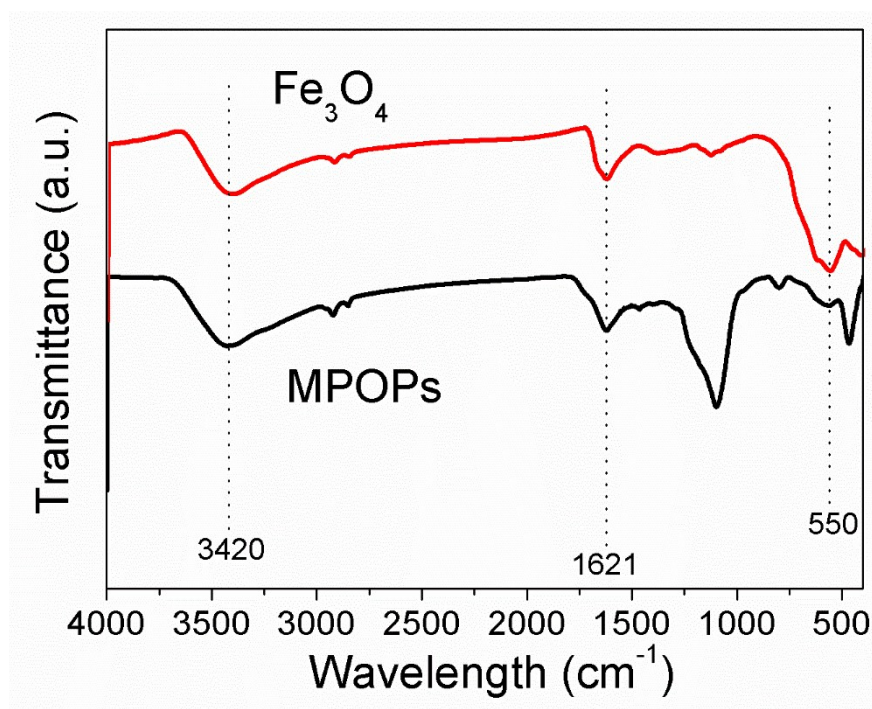

**Fig. S4** FT-IR spectra of  $\text{Fe}_3\text{O}_4$  and MPOPs. The FTIR spectra of MPOPs clearly exhibit characteristic adsorption peaks of both PDA and  $\text{Fe}_3\text{O}_4$ , including the adsorption bands at 3420  $\text{cm}^{-1}$ , 1621  $\text{cm}^{-1}$ , and 550  $\text{cm}^{-1}$  attributed to the stretching vibration of phenolic O–H and N–H, the stretching vibration of aromatic ring and bending vibration of N–H, and the Fe–O vibration of  $\text{Fe}_3\text{O}_4$ , respectively.

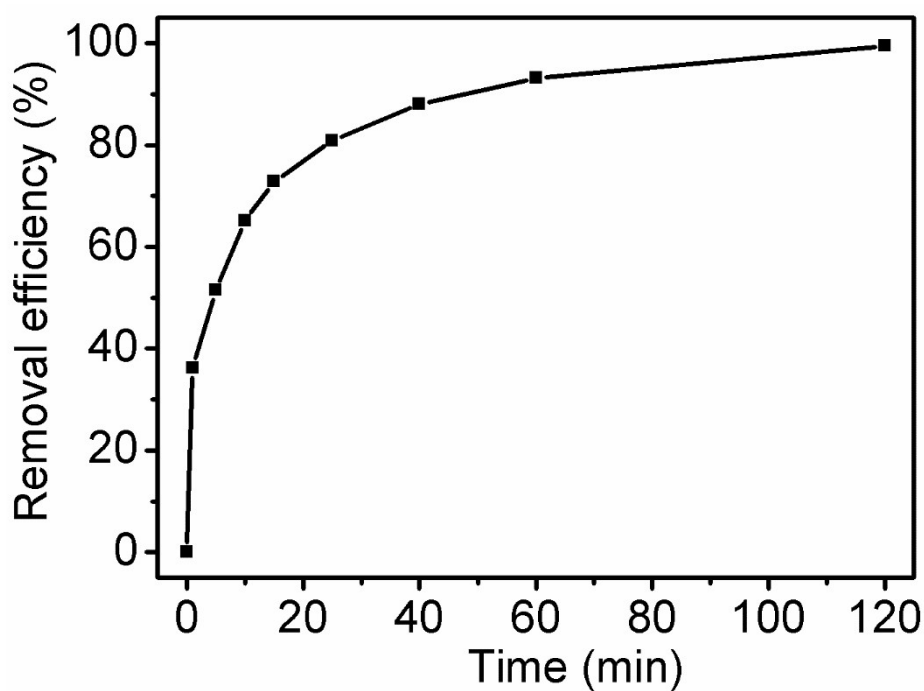

**Fig. S5** The degradation experiment of MPOPs to MB at pH 2 with prolonging the reaction time to 2 hr.

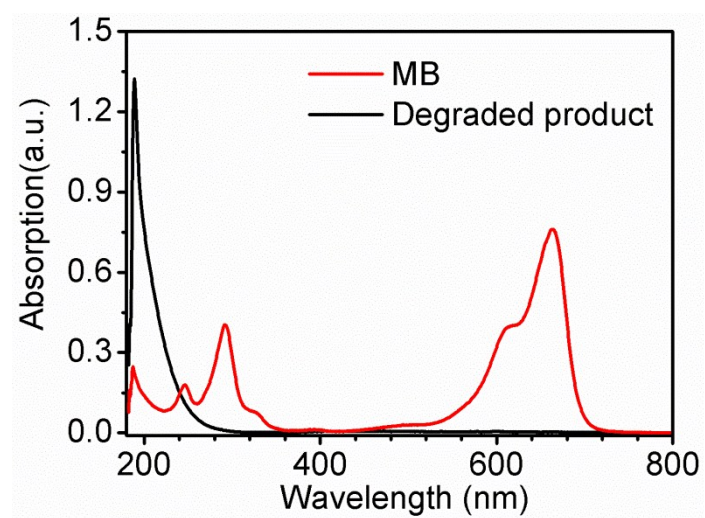

Fig. S6 The UV adsorption spectra of MB and the supernatant from washing from the MPOPs after Fenton reaction.

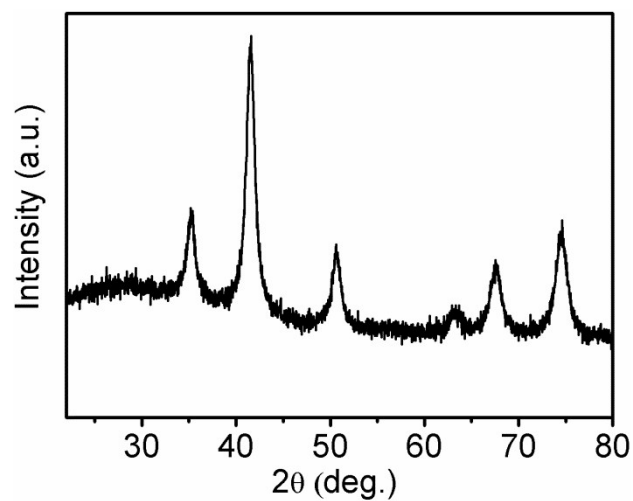

Fig. S7 The XRD of the MPOPs after the Fenton process.



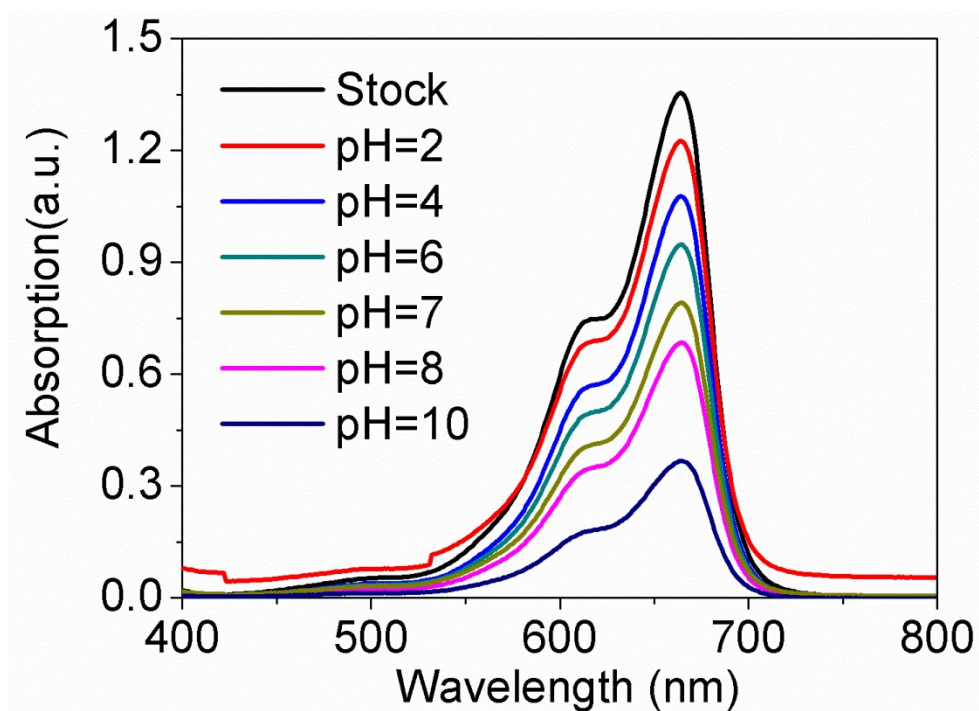

**Fig. S8** The adsorption experiments of MPOPs to MB at different pH conditions without  $\text{H}_2\text{O}_2$ .

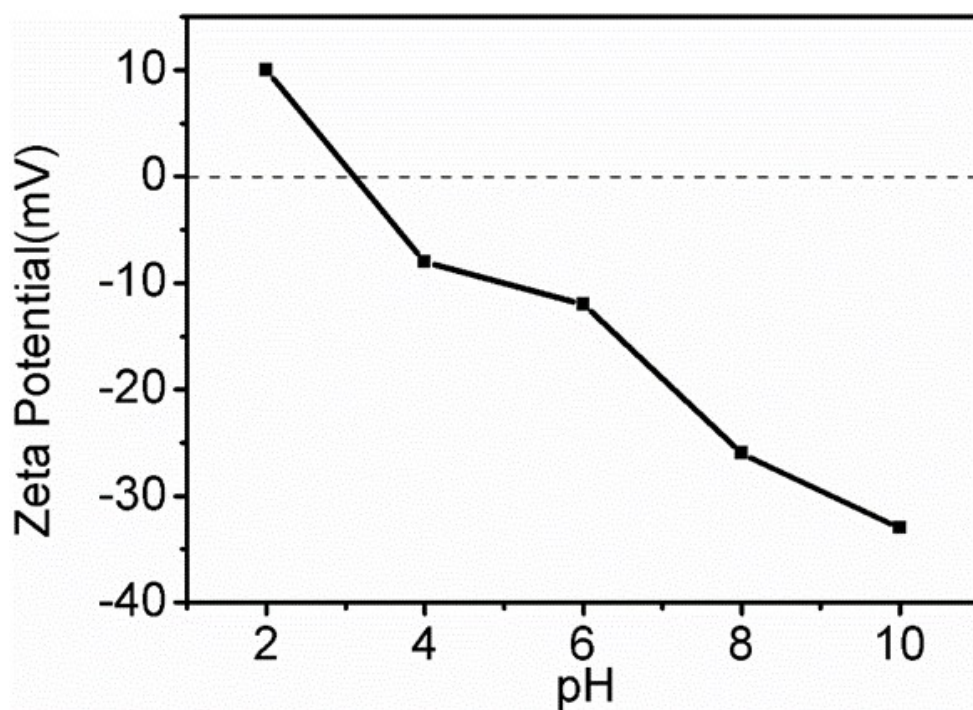

**Fig. S9** The zeta potential of MPOPs as a function of pH.

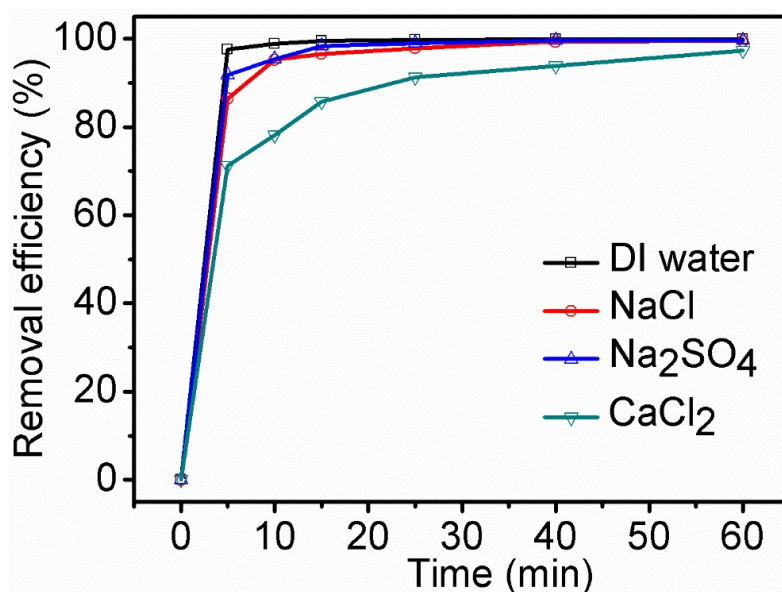

Fig.S10 Effect of co-existing ions, including NaCl, Na<sub>2</sub>SO<sub>4</sub> and CaCl<sub>2</sub>, on removal efficiency of MPOPs to MB (experimental condition: MPOPs: 2 mg; MB: 40 ppm, 20 mL, pH 7; ionic strength of all the salts: 0.1 M).

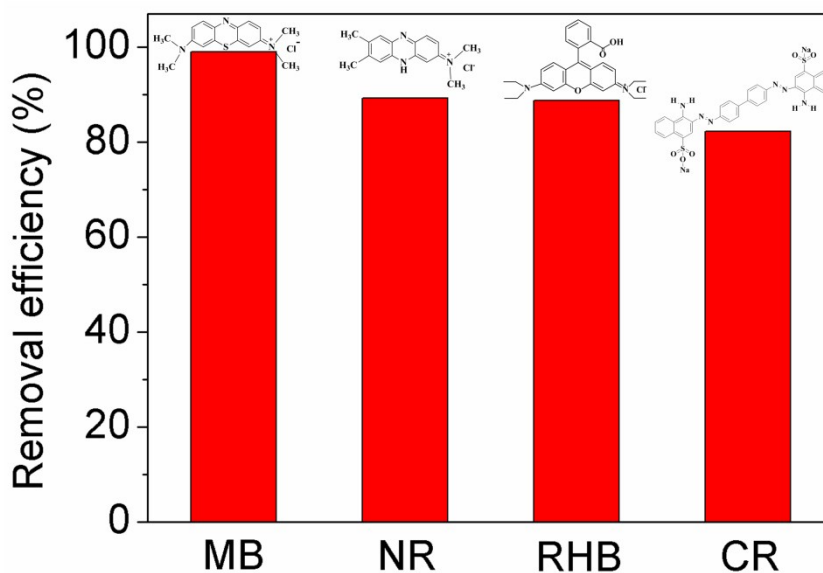

**Fig. S11** Degradation efficiency of MPOPs to three organic pollutants, including Neutral Red (NR), Rhodamine B (RHB) and Congo Red (CR), at pH = 7 (20 mL, 80 ppm) for 60 min.

**Table S1** The parameters of two classic kinetic models

|                                       | Pseudo-first order kinetic model |        |                        | Pseudo-second order kinetic model      |        |                        |
|---------------------------------------|----------------------------------|--------|------------------------|----------------------------------------|--------|------------------------|
|                                       | $K_1/\text{min}^{-1}$            | $R^2$  | $q_e/\text{mg g}^{-1}$ | $K_2/\text{g mg}^{-1} \text{min}^{-1}$ | $R^2$  | $q_e/\text{mg g}^{-1}$ |
| pH 2                                  | 0.036                            | 0.9962 | 745                    | $1 \times 10^{-4}$                     | 0.9712 | 770                    |
| pH 4                                  | 0.156                            | 0.9994 | 795                    | $3 \times 10^{-4}$                     | 0.9987 | 770                    |
| pH 6                                  | 0.182                            | 0.9997 | 795                    | $8 \times 10^{-4}$                     | 0.9978 | 770                    |
| pH 7                                  | 0.290                            | 0.9999 | 795                    | $3 \times 10^{-3}$                     | 0.9983 | 770                    |
| pH 10                                 | 0.427                            | 0.9999 | 795                    | $8 \times 10^{-3}$                     | 0.9983 | 770                    |
| Fe <sup>2+</sup> pH 4                 | 0.161                            | 0.9977 | 786                    | $3 \times 10^{-4}$                     | 0.9847 | 770                    |
| Fe <sup>2+</sup> pH 7                 | $3 \times 10^{-3}$               | 0.9847 | 443                    | $7 \times 10^{-5}$                     | 0.9107 | 476                    |
| Fe <sub>3</sub> O <sub>4</sub> , pH 7 | $7.83 \times 10^{-4}$            | 0.9999 | 156                    | $4 \times 10^{-3}$                     | 0.9881 | 163                    |

**Table S2** The exhibition of catalytic performance of different iron oxide based materials.

| Catalysts/mass                                                                    | Dye concentration/<br>volume | Time     | Dye<br>removal<br>rate | pH   | Removal<br>capacity<br>(mg g <sup>-1</sup> ) |
|-----------------------------------------------------------------------------------|------------------------------|----------|------------------------|------|----------------------------------------------|
| <sup>2</sup> MPCMS-500/20<br>mg                                                   | 40 ppm, 10 mL                | 40 min   | 100 %                  | 5    | 20                                           |
| <sup>3</sup> Fe <sub>3</sub> O <sub>4</sub> @PDA-<br>MnO <sub>2</sub> /<br>5 mg   | 40 ppm, 25 mL                | 30 min   | 94 %                   | 2-12 | 200                                          |
| <sup>4</sup> Fe <sub>3</sub> C/C/10 mg                                            | 20 ppm, 100 mL               | 50 min   | 100 %                  | 2-12 | 200                                          |
|                                                                                   | 150 ppm, 100 mL              | 200 min  | 56 %                   |      | 660                                          |
| <sup>5</sup> TA <sub>0.02</sub> - Fe <sub>3</sub> O <sub>4</sub> /10<br>mg        | 40 ppm, 10 mL                | 12.5 min | 100 %                  | 3-7  | 40                                           |
| <sup>6</sup> Fe <sub>2</sub> O <sub>3</sub> @mesoporou<br>s silica/10 mg          | 50 ppm, 20 mL                | 420 min  | 90 %                   | -    | 100                                          |
| <sup>7</sup> Fe <sub>2.22</sub> Ti <sub>0.78</sub> O <sub>4</sub> /1.2 g          | 100 ppm, 400 mL              | 60 min   | 98 %                   | 7    | 3.3                                          |
| <sup>8</sup> TEA/GO/@Fe <sub>3</sub> O <sub>4</sub> /<br>10 mg                    | 100 ppm, 50 mL               | 5 min    | 99 %                   | 4    | 500                                          |
| <sup>9</sup> Fe <sup>0</sup> - Fe <sub>3</sub> O <sub>4</sub> -RGO/<br>10 mg      | 50 ppm, 100 mL               | 60 min   | 98 %                   | 3    | 500                                          |
| <sup>10</sup> Fe <sub>3</sub> O <sub>4</sub> /Fe/Fe <sub>3</sub> C@<br>PCNF/40 mg | 100 ppm, 40 mL               | 30       | 98 %                   | 4.5  | 100                                          |
| MPOPs/2 mg (This<br>work)                                                         | 40 ppm, 20 mL                | 10       | 99 %                   | 2-10 | 400                                          |
|                                                                                   | 300 ppm, 20 mL               | 60       | 87 %                   |      | 2600                                         |

**Table S3** The exhibition of Fe-leaching experiment data of different iron based materials.

|                                                                                | [Fe, ppm] Catalyst | [Fe, ppm] Dissolved | Iron loss % |
|--------------------------------------------------------------------------------|--------------------|---------------------|-------------|
| <sup>11</sup> Fe-NaY                                                           | 7.6                | 2.1                 | 27.6        |
| <sup>12</sup> Fe <sub>2</sub> O <sub>3</sub> /γ-Al <sub>2</sub> O <sub>3</sub> | 20                 | 5                   | 20          |
| <sup>11</sup> Fe-TS-1                                                          | 3.8                | 0.6                 | 15.7        |
| <sup>13</sup> CuFe <sub>2</sub> O <sub>4</sub>                                 | 23.5               | 1.8                 | 7.6         |
| <sup>14</sup> Fe <sub>3</sub> O <sub>4</sub> @CeO <sub>2</sub>                 | 620                | 11.8                | 1.9         |
| MPOPs                                                                          | 27.4               | 0.4                 | 1.4         |

## References

- 1 (a)J. L. L. Xiao, D. F. Brougham, E. K. Fox, N. Feliu, A. Bushmelev,, N. M. A. Schmidt, F. Kiessling, M. Valldor, B. Fadeel and and S. Mathur, *ACS Nano*, 2011, **5**, 6315-6324; (b)X. L. Qiu, Q. L. Li, Y. Zhou, X. Y. Jin, A. D. Qi and Y. W. Yang, *Chem. Commun.*, 2015, **51**, 4237-4240.
- 2 L. Zhou, Y. Shao, J. Liu, Z. Ye, H. Zhang, J. Ma, Y. Jia, W. Gao and Y. Li, *ACS Appl. Mater. Interfaces*, 2014, **6**, 7275-7285.
- 3 X. Pan, S. Cheng, T. Su, G. Zuo, W. Zhao, X. Qi, W. Wei and W. Dong, *Colloid Surf. B-Biointerfaces*, 2019, **181**, 226-233.
- 4 W. Huang, F. Wang, N. Qiu, X. Wu, C. Zang, A. Li and L. Xu, *J. Hazard. Mater.*, 2019, **378**, 120728.
- 5 C. Hou, Y. Wang, H. Zhu and H. Wei, *J. Taiwan Inst. Chem. Eng.*, 2016, **60**, 438-444.
- 6 Z. M. Cui, Z. Chen, C. Y. Cao, L. Jiang and W. G. Song, *Chem. Commun.*, 2013, **49**, 2332-2334.
- 7 S. Yang, H. He, D. Wu, D. Chen, X. Liang, Z. Qin, M. Fan, J. Zhu and P. Yuan, *Appl. Catal. B-Environ.*, 2009, **89**, 527-535.
- 8 Z. Cao, X. Wen, P. Chen, F. Yang, X. Ou, S. Wang and H. Zhong, *Colloid Surf. A-Physicochem. Eng. Asp.*, 2018, **549**, 94-104.
- 9 B. Yang, Z. Tian, L. Zhang, Y. Guo and S. Yan, *Journal of Water Process Engineering*, 2015, **5**, 101-111.
- 10 S. H. Yoo, D. Jang, H. Joh and S. Lee, *J. Mater. Chem. A*, 2017, **5**, 748-755.
- 11 J. L. S. Gabriel Ovejero, Fernando Martı́nez, Juan A. Melero, and and L. Gordo, *Ind. Eng. Chem. Res.*, 2001, **40**, 3921-3928.
- 12 M. Lu, Y. Yao, L. Gao, D. Mo, F. Lin and S. Lu, *Water Air Soil Pollut.*, 2015, **226**, 87.
- 13 M. A. Fontecha-Cámara, C. Moreno-Castilla, M. V. López-Ramón and M. A. Álvarez, *Appl. Catal. B-Environ.*, 2016, **196**, 207-215.
- 14 L. Xu and J. Wang, *Environ. Sci. Technol.*, 2012, **46**, 10145-10153.
